# Supplementary material
Source: PubMed Central journal article supplement (PMC3807868)
Supplement: NIHMS509143-supplement-2.pdf [file NIHMS509143-supplement-2.pdf]

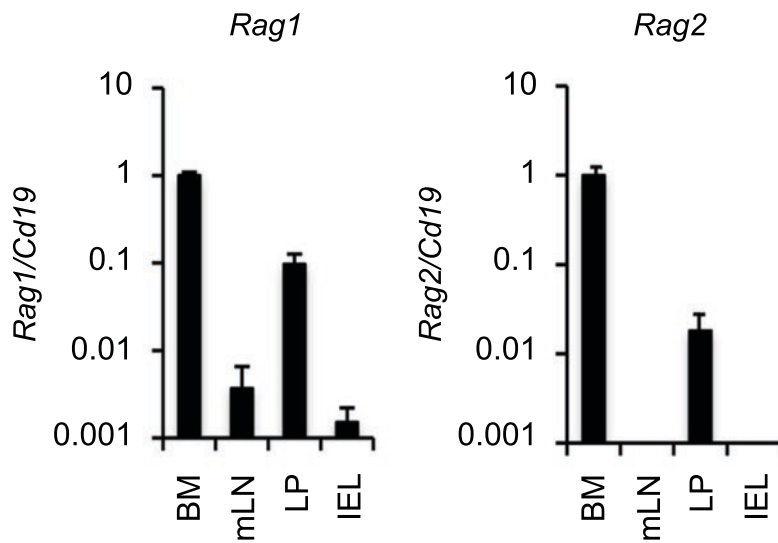

**Supplementary Figure 1 | *Rag1* and *Rag2* are expressed in the small intestinal lamina propria of young wild type mice.** Quantitative PCR analysis of *Rag1* and *Rag2* expression in the bone marrow (BM), mesenteric lymph nodes (mLN), small intestinal lamina propria (LP), and intraepithelial lymphocytes (IEL) of 3 wk-old wild type Balb/c mice. Relative *Rag1* and *Rag2* expression levels of each tissue sample were normalized to *Cd19* expression. The *y*-axis indicates expression levels relative to BM. Shown are mean values  $\pm$  s.e.m of three independent experiments.

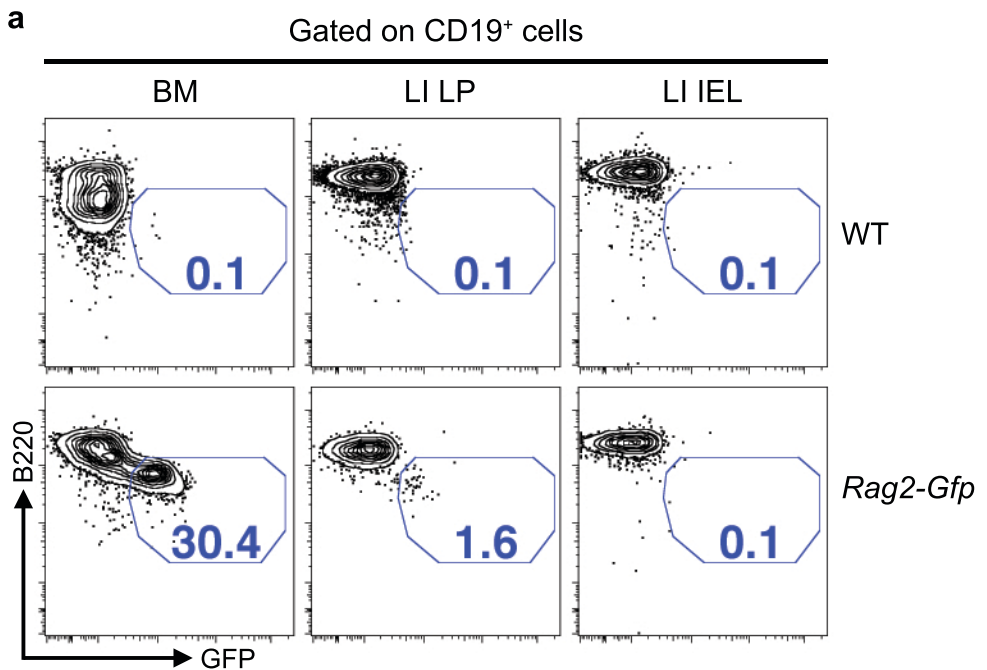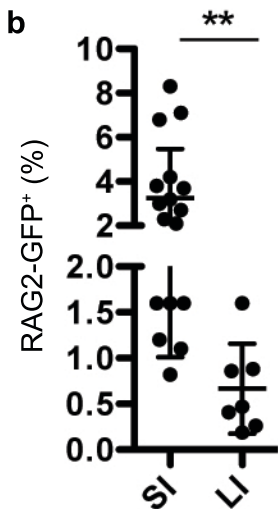

**Supplementary Figure 2 | RAG2-GFP<sup>+</sup> B cells are found in the large intestine at lower levels compared with the small intestine.** **a**, FACS plots of CD19<sup>+</sup> gated cells from bone marrow (BM), large intestinal intraepithelial lymphocytes (LI IEL) and large intestinal lamina propria (LI LP) from wild type (WT) (top plots) or homozygous *Rag2-Gfp* knock-in (bottom plots) mice at post-natal day 18. Plots show B220 expression against GFP fluorescence. Numbers in the plots denote percentage of CD19<sup>+</sup> cells that are B220<sup>low</sup> RAG2-GFP<sup>+</sup>. Wild type (WT) BM was analyzed as a control to measure background autofluorescence. **b**, Dot plot of cumulative data demonstrating the percentage of RAG2-GFP<sup>+</sup> among CD19<sup>+</sup> cells in the LP of small intestine (SI) and large intestine (LI). The post-natal age 18-21 RAG2-GFP<sup>+</sup> SI LP data from from Figure 1b is plotted here as well for comparison. Each point represents one mouse. Shown are mean values  $\pm$  s.e.m. \*\* $P < 0.01$  (two-tailed Student's *t*-test).

Age 4 weeks: Gated on CD19<sup>+</sup>

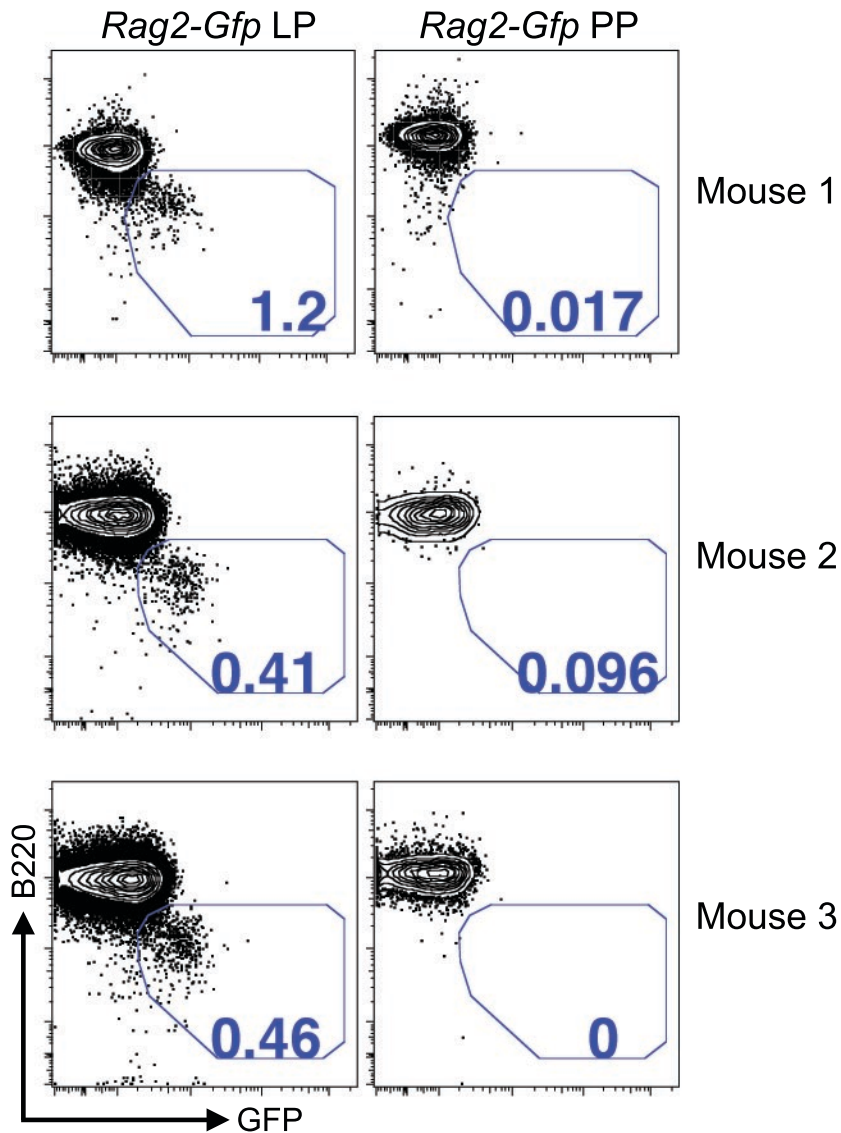

**Supplementary Figure 3 | Peyer's patches do not harbor RAG2-GFP<sup>+</sup> cells.** FACS plots of CD19<sup>+</sup> gated cells from the lamina propria (LP) and Peyer's patches (PP) isolated from three independent *Rag2-Gfp* mice on post-natal day 28. The numbers in the gates shown indicate percentage of B220<sup>low</sup> RAG2-GFP<sup>+</sup> cells out of total CD19<sup>+</sup> cells. These data indicate that RAG2-GFP<sup>+</sup> cells are found in the LP, but not in the PP.

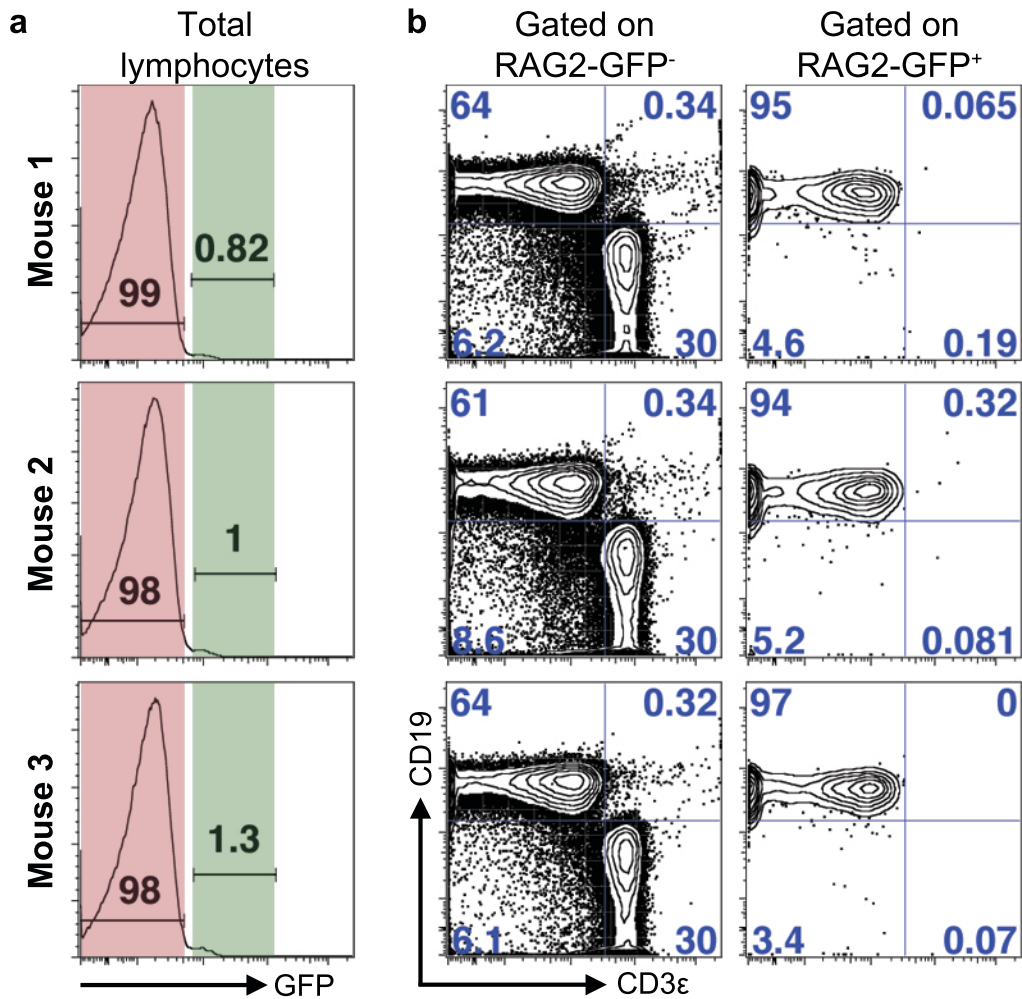

**Supplementary Figure 4 | RAG2-GFP is not detected in LP T lineage cells. a,**

Histogram plots showing flow cytometric measurement of RAG2-GFP<sup>-</sup> (red) and RAG2-GFP<sup>+</sup> (green) cell populations from total small intestinal LP lymphocytes at post-natal day 18-21. Cells were stained for CD19 and the pan T cell lineage marker, CD3ε. **b,** The RAG2-GFP<sup>-</sup> and RAG2-GFP<sup>+</sup> gated cells were plotted to reveal the B (CD19<sup>+</sup> CD3ε<sup>-</sup>, upper left quadrant) and T (CD19<sup>-</sup> CD3ε<sup>+</sup>, lower right quadrant) lineage populations present in each gate. These data show that the great majority of RAG2-GFP<sup>+</sup> cells are contained within the CD19-expressing population and are not found in the CD3ε-expressing cells. Plots from three mice are shown.

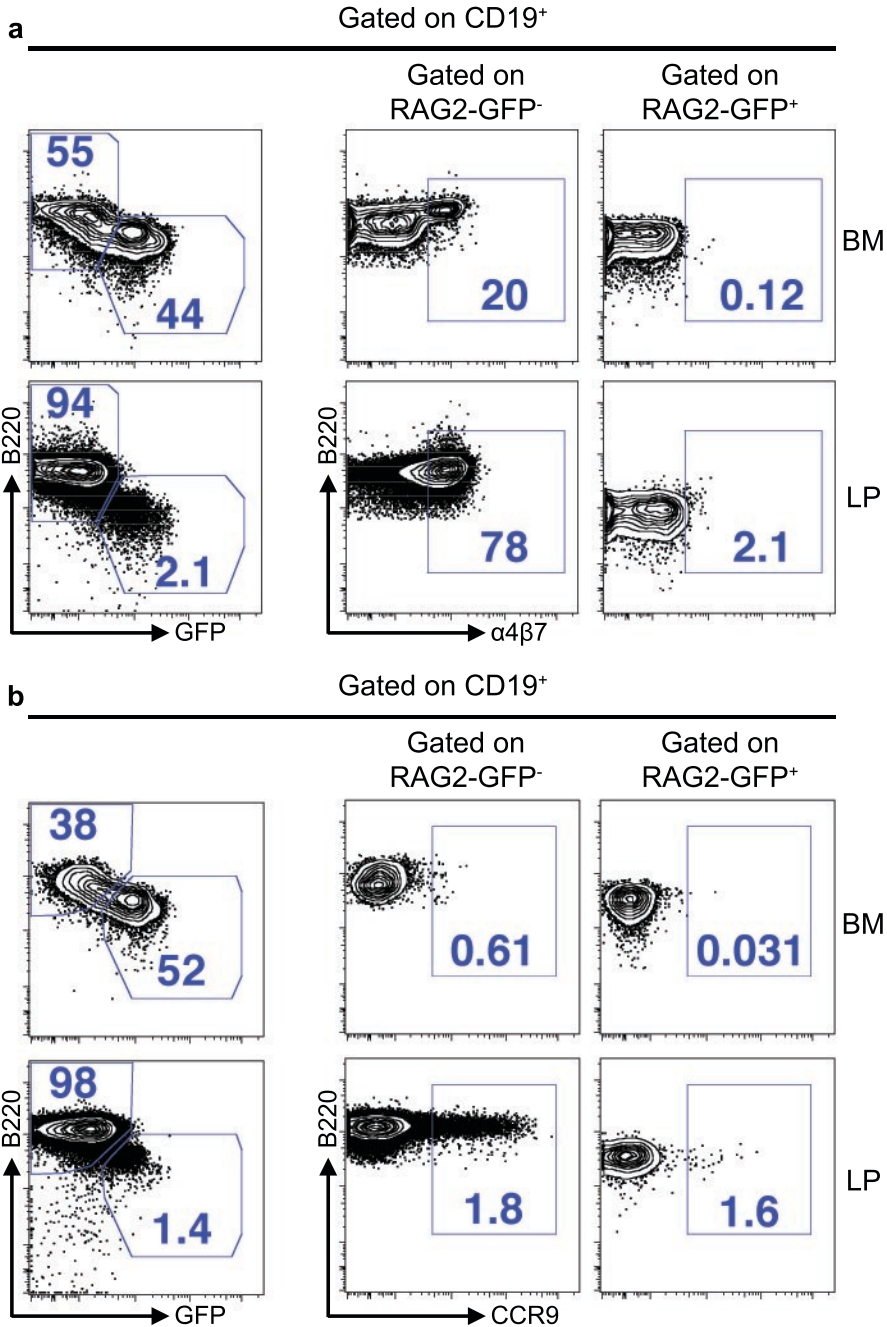

**Supplementary Figure 5 | Small intestinal LP-resident RAG2-GFP<sup>+</sup> B lineage cells do not express  $\alpha 4\beta 7$  or CCR9.** **a,b**, Both  $\alpha 4\beta 7$  integrin and CCR9 chemokine receptor have been implicated in lymphocyte homing to the gut<sup>31</sup>. Lymphocytes from *Rag2-Gfp* mice were stained for surface expression of CD19, B220,  $\alpha 4\beta 7$  (**a**) and CCR9 (**b**). Lymphocytes were first gated for CD19 expression, then both RAG2-GFP<sup>-</sup> and RAG2-GFP<sup>+</sup> cells from CD19<sup>+</sup> gated cells were analyzed for expression of B220 and  $\alpha 4\beta 7$  (**a**) or B220 and CCR9 (**b**). Numbers indicate percentage of cells within the indicated gates of total cells in the plot. RAG2-GFP<sup>-</sup> cells (left plots, top left gate). These data show that RAG2-GFP<sup>+</sup> cells do not express  $\alpha 4\beta 7$  or CCR9. This experiment was repeated once with similar results.

Gated on CD19<sup>+</sup>

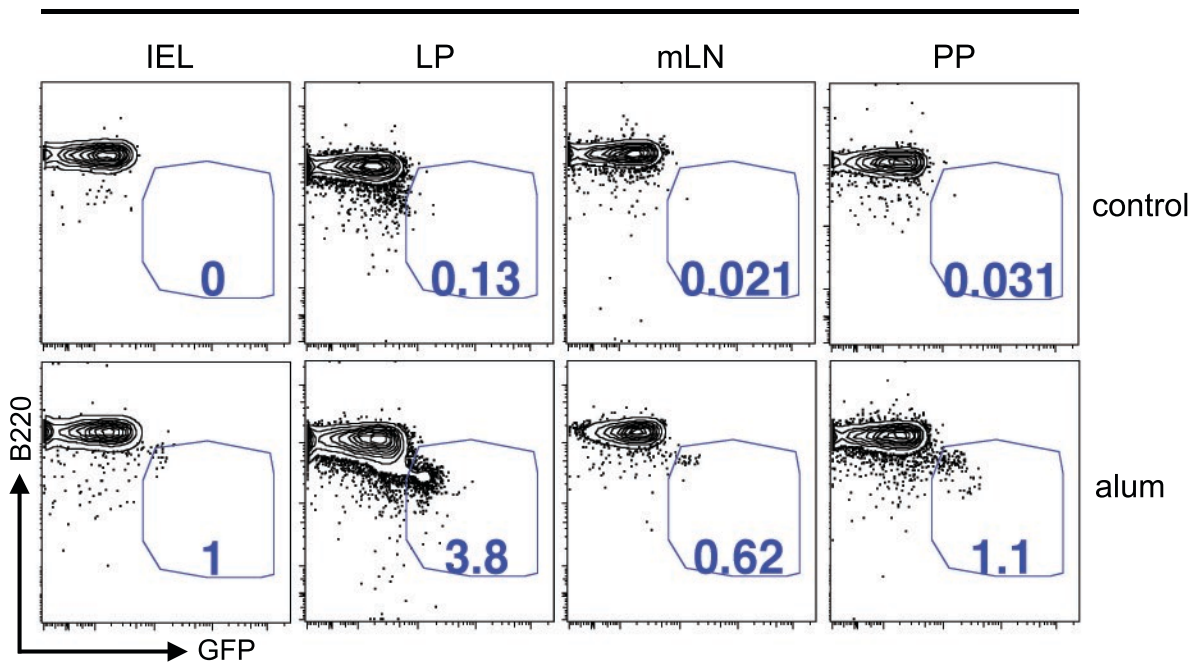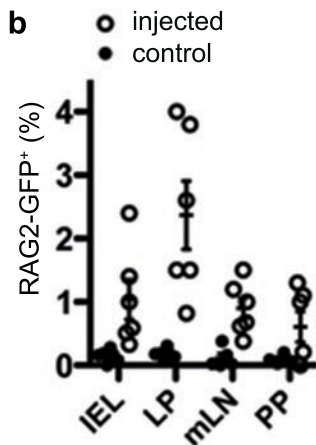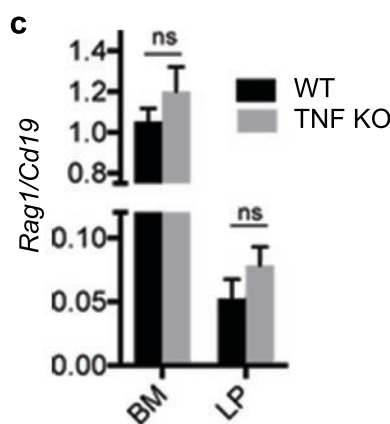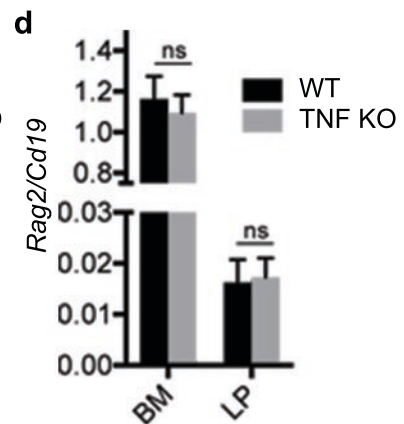

**Supplemental Figure 6 | Intraperitoneal alum injection leads to the appearance of RAG2<sup>+</sup> cells in the gut mucosa.** **a**, FACS plots of CD19<sup>+</sup> gated cells showing the percentages of RAG2-GFP<sup>+</sup> B220<sup>low</sup> cells from uninjected (control) or mice injected with intraperitoneal alum. **b**, Scatter dot plot showing percentage of B220<sup>low</sup> RAG2-GFP<sup>+</sup> of CD19<sup>+</sup> gated cells from the indicated tissues in adult (4-6 mo.) mice injected (open circles) or not injected (closed circles). Mean values ± s.e.m. are shown. "PP" denotes Peyer's patches. **c**, Quantitative PCR analysis of *Rag1* and *Rag2* expression from bone marrow (BM) and small intestinal lamina propria (LP) of 3 wk-old wild type (WT) controls or mice deficient in tumor necrosis factor- $\alpha$  (TNF KO). Levels of each were normalized to *Cd19* expression. The y-axis indicates levels relative to those of BM. Shown are mean values ± s.e.m of three independent experiments. "ns" denotes non-significant (two-tailed Student's *t*-test).

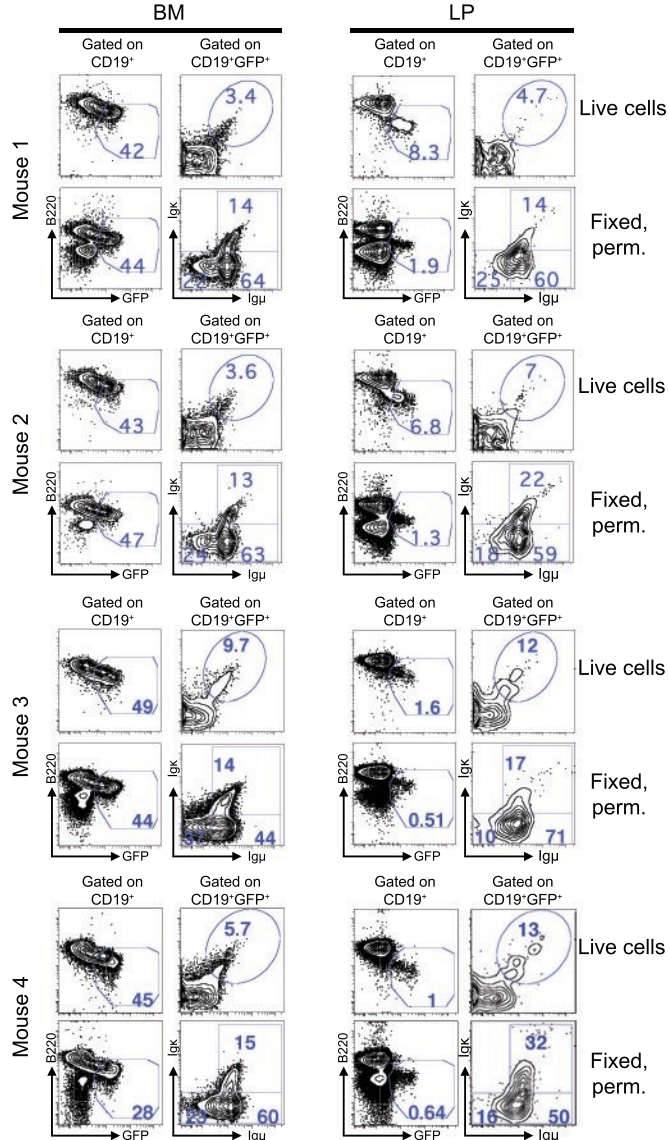

**Supplementary Figure 7 | Analysis of RAG2-GFP<sup>+</sup> B lineage developmental subsets.** FACS plots showing bone marrow (BM) and small intestinal lamina propria (LP) cells from post-natal day 17-24 *Rag2-Gfp* mice, which were stained live (top plots), or after fixation and permeabilization (bottom plots) for CD19, B220,  $\mu$  heavy chain (Ig $\mu$ ), and Ig $\kappa$ . The CD19<sup>+</sup> gated plots on the left of each set show the polygon gate capturing the RAG2-GFP<sup>+</sup> cells, which are analyzed in the plots immediately to their right for staining with anti-Ig $\mu$  (x-axis) and anti-Ig $\kappa$  (y-axis). Live cells positive for both Ig $\mu$  and Ig $\kappa$  are surface IgM<sup>+</sup>, and are identified in the oval gates (top, right plots of each set). Based on prior studies and classification (see text for details). The CD19<sup>+</sup>, RAG2-GFP<sup>+</sup>, Ig $\mu$ <sup>-</sup> Ig $\kappa$ <sup>-</sup> cells (bottom right plots, bottom left gate) are pro-B cells, Ig $\mu$ <sup>+</sup> Ig $\kappa$ <sup>-</sup> (bottom right plots, bottom right gate) are pre-B cells, and Ig $\mu$ <sup>+</sup> Ig $\kappa$ <sup>+</sup> cells (bottom right plots, top right gate) are immature B cells undergoing editing. RAG2<sup>+</sup> cells expressing surface IgM have also been identified as editing B cells<sup>2</sup>. Percentages are indicated in each gate. Statistical analysis of these data are shown in Figure 2a, where mean values  $\pm$  s.e.m of pro-B, pre-B, immature-B and surface IgM<sup>+</sup> B lineage cells out of total RAG2-GFP<sup>+</sup> cells are plotted. Student's *t*-tests failed to detect significant differences between any of the BM and LP subgroups.

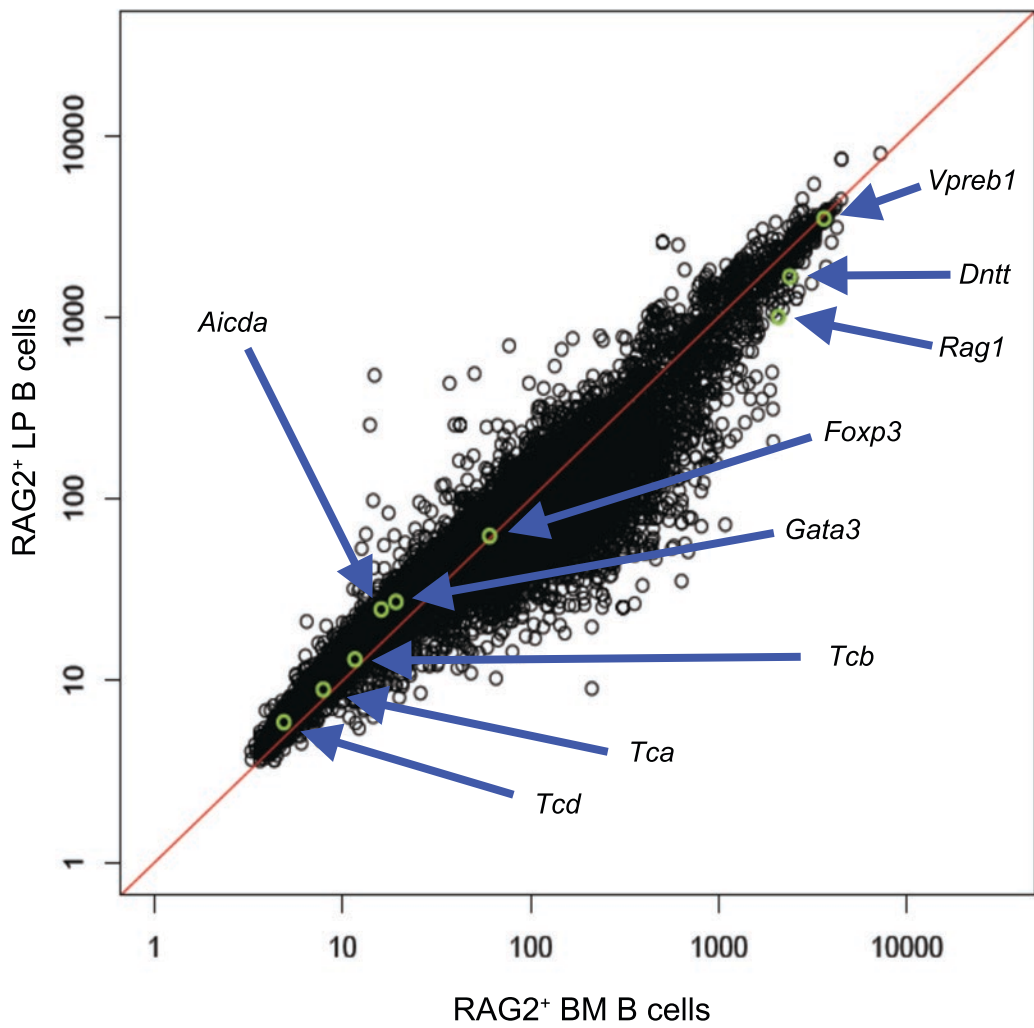

**Supplementary Figure 8 | Comparative transcriptome analysis indicates a high degree of similarity between bone marrow (BM) and small intestinal lamina propria (LP) RAG2-GFP<sup>+</sup> cells.** Scatter plot of affymetrix 1.0 ST microarray data comparing RAG2-GFP<sup>+</sup> cells from BM versus RAG2-GFP<sup>+</sup> cells sorted from LP. Although statistical *t*-tests showed some nominally significant differentially expressed genes, none passed correction for multiple comparisons testing (Benjamini-Hochberg procedure). Arrows point to selected genes highlighted in green that are not expected to be expressed to significant levels in early lineage cells (*Foxp3*, *Gata3*, *Tca*, *Tcb*, *Tcd*, *Aicda*), as well as genes that are expected to be expressed at early stages of B lineage development (*Vpreb1*, *Dntt*, *Rag1*) for comparison. These data indicate a high degree of transcript similarity between these two populations.



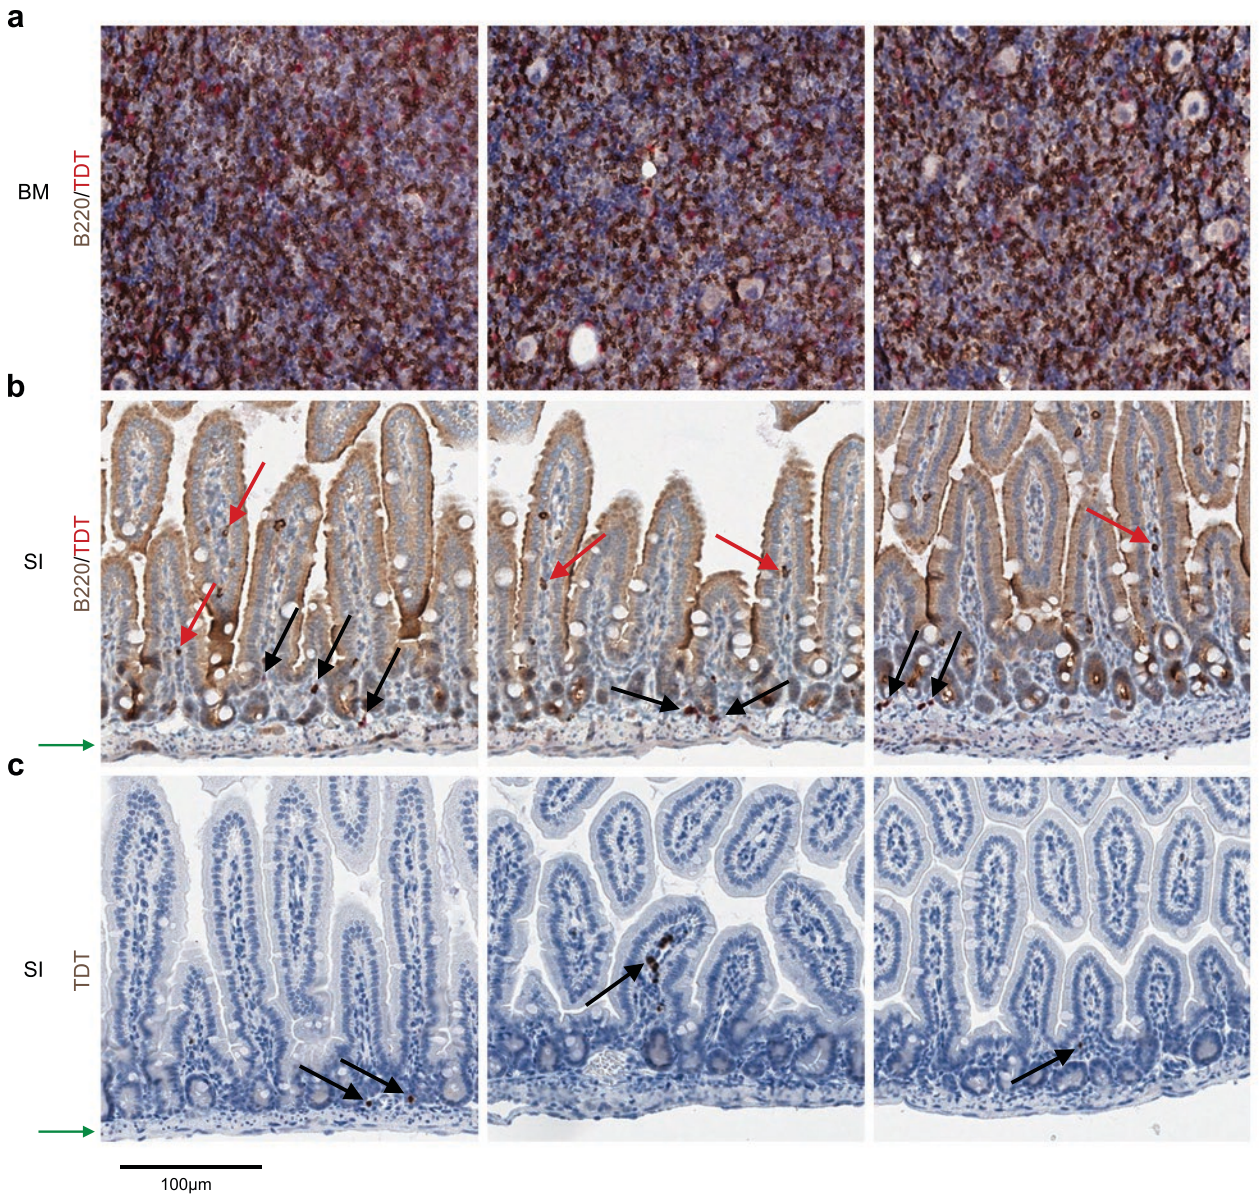

**Supplementary Figure 9 | Immunohistochemistry (IHC) identifies TdT<sup>+</sup> B lineage cells in the gut lamina propria.** **a,b**, IHC of paraffin-embedded section from BM (**a**) and small intestines (SI, **b**) stained with an anti-TdT antibody (red stain) plus anti-B220 antibody (brown stain). **b**, Red arrows point to LP-resident B220<sup>high</sup> TdT negative cells that represent mature B cells. Black arrows point to LP-resident TdT<sup>+</sup> B220<sup>low</sup> cells that resemble BM pro-B cells (**a**). **c**, IHC sections of small intestines (SI) stained with an anti-TdT antibody alone. Dark brown indicates TdT-reactivity. Sections were counterstained with alcian green to identify nuclei. These SI images are representative of what we used to calculate distance of TdT<sup>+</sup> and TdT<sup>-</sup> B lineage cells to the serosal (antiluminal) surface shown in Supplementary Figure 10. The serosal surfaces are indicated by the green arrows.

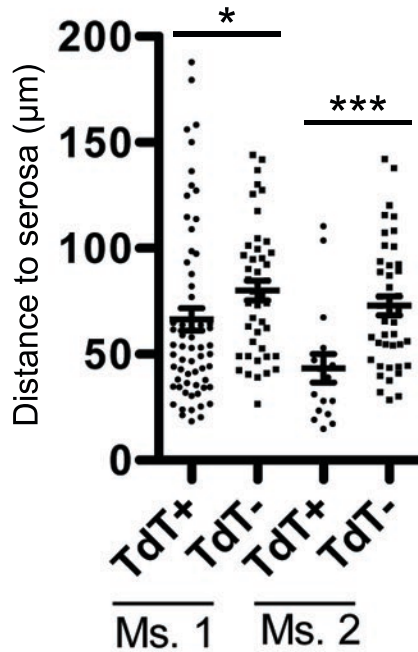

**Supplementary Figure 10 | Intestinal TdT<sup>+</sup> B lineage cells occupy distinct location compared to TdT<sup>-</sup> B cells.** Quantitative measurements of the distance between individual small intestinal lamina propria resident TdT<sup>+</sup> or TdT<sup>-</sup> B220<sup>+</sup> cells and the serosal (antiluminal) surface from two independent mice (Ms.1 and Ms. 2). Mean levels  $\pm$  s.e.m. are also shown. \* $P < 0.05$ , \*\*\* $P < 0.001$  (two-tailed Student's t-test).

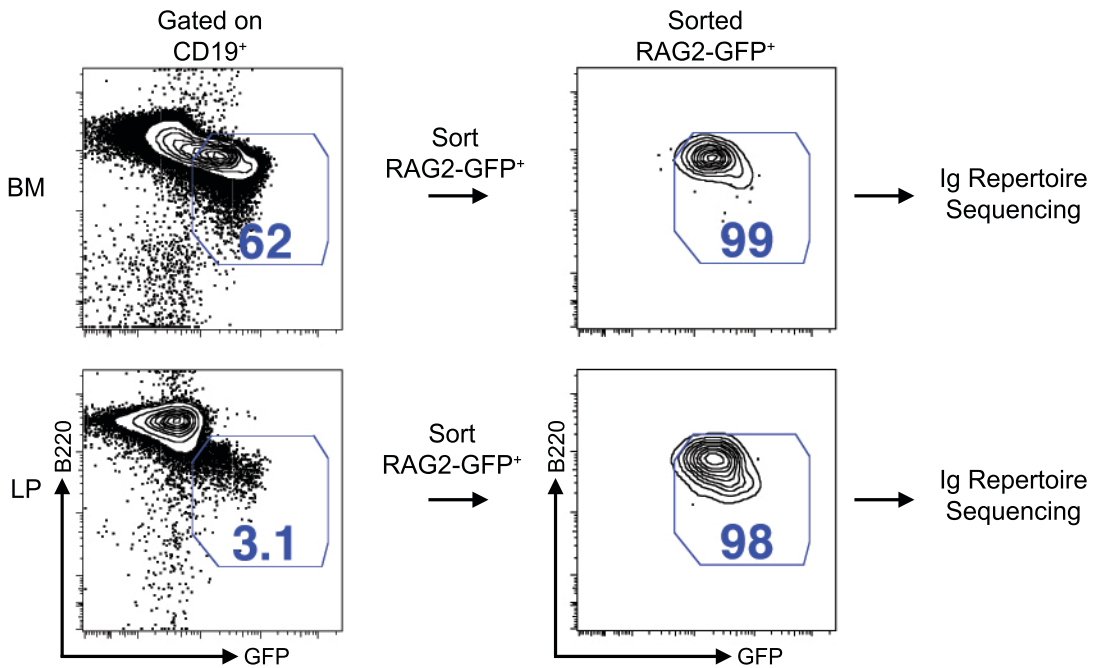

**Supplementary Figure 11 | Sorting strategy for repertoire sequencing.** This is a schematic diagram showing the sorting strategy to prepare samples for repertoire sequencing. The FACS plots on the left show CD19<sup>+</sup> gated cells from bone marrow (BM) and small intestinal lamina propria (LP) with additional polygonal gates showing RAG2-GFP<sup>+</sup> cells before (left) and after (right) sorting. Sorted cells were then subjected to repertoire sequencing.

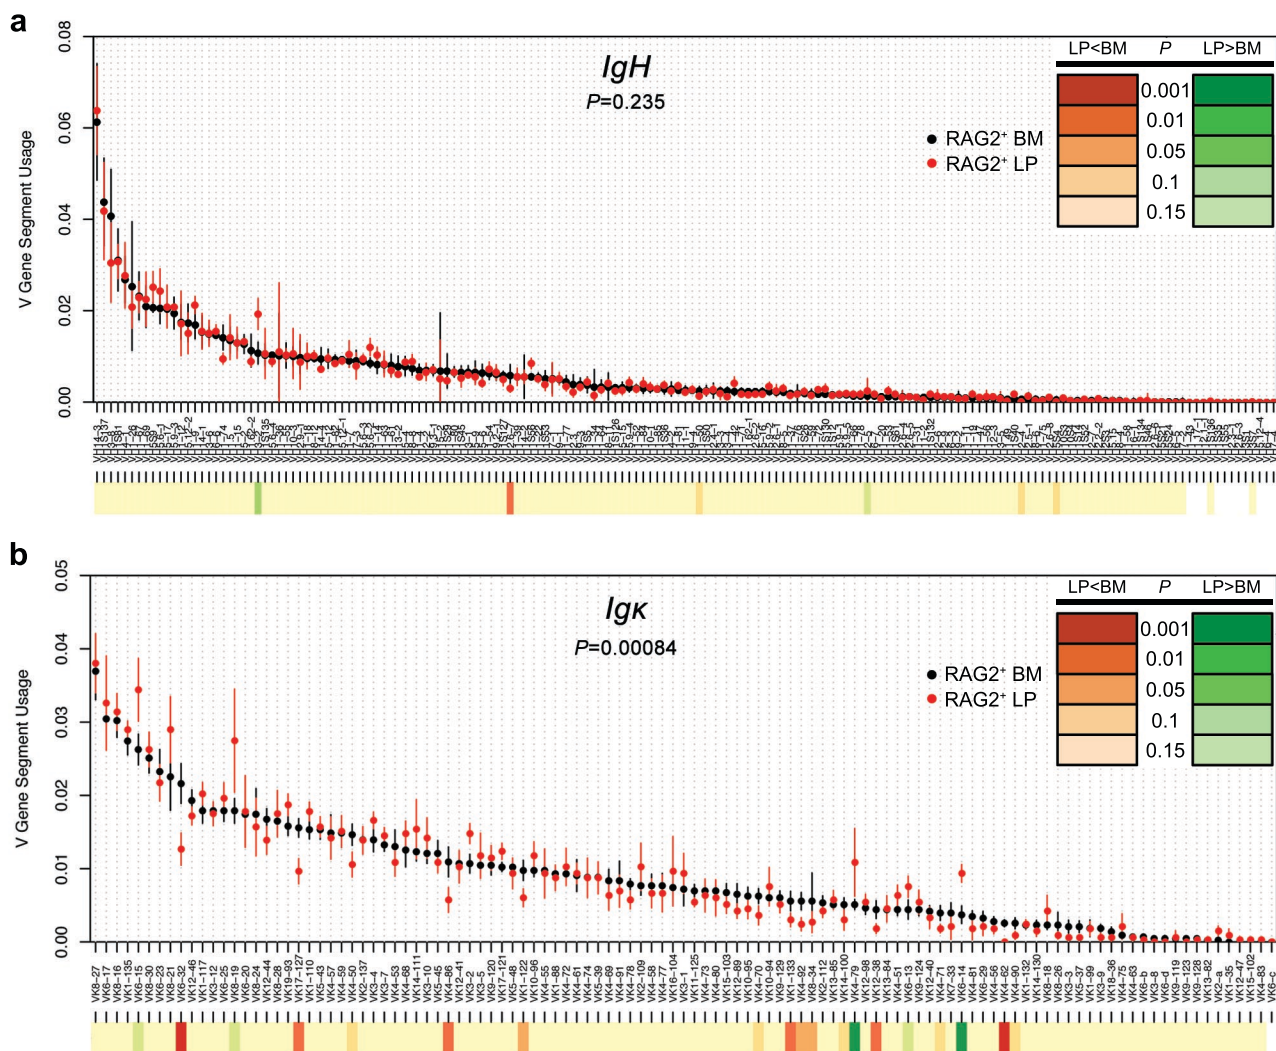

**Supplementary Figure 12 | Distinct  $V\kappa$  segment usage in RAG2<sup>+</sup> cells from BM and LP.**

**a,b.** Dot plots showing distribution of *IgH*  $V_H$  segment ( $V_H$ ) (**a**) and *Igk*  $V\kappa$  segment ( $V\kappa$ ) (**b**) usage in RAG2-GFP<sup>+</sup> cells sorted from bone marrow (BM, black dots) and small intestinal lamina propria (LP, red dots) as determined by 454 pyrosequencing. Aligned sequences with unique (determined by  $V(D)J$  junction analysis), in-frame  $V(D)J$  junctions were analyzed. Individual  $V$  gene segment usage ( $y$ -axis) was calculated by dividing the number of individual  $V_H$  or  $V\kappa$  gene segments by the total number of in-frame  $V_H$  or  $V\kappa$  gene segments represented in our sequencing data set, respectively. Individual  $V_H$  and  $V\kappa$  gene segments are arranged on the  $x$ -axis in order of highest to lowest utilization found in the bone marrow samples. Individual  $V$  gene segment names are shown. Plotted are the means  $\pm$  s.e.m. of at least 4 experiments each consisting of a pool of 8-12 mice for each independent experiment. The  $P$  value for overall difference between BM and LP  $V$  segment utilization was calculated with the  $\chi^2$  test. Heat map under dot plots shows sequence utilization differences between RAG2<sup>+</sup> BM vs. RAG2<sup>+</sup> LP with intensity of color specifying increased significance of the indicated  $P$  values as calculated by the exact test for differential expression ( $P$  values corresponding to color shown in inset).

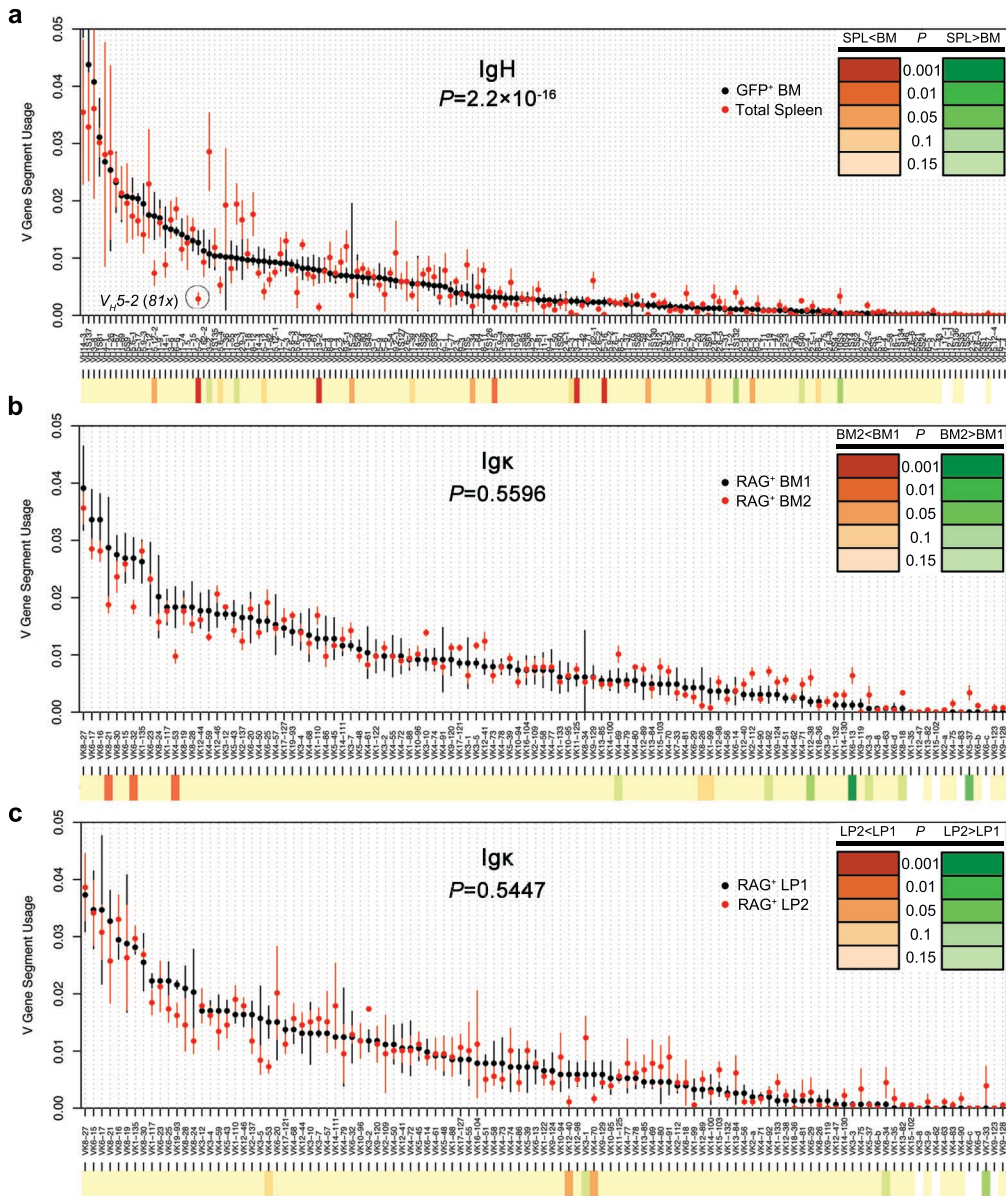

### Supplementary Figure 13 | Control comparisons of the repertoire sequencing data.

**a**, Dot plot and heat map comparing *IgH* V segment ( $V_H$ ) usage between RAG2<sup>+</sup> BM B lineage cells and total splenic B cells. As expected, several prominent and significant differences are observed between these subsets including the  $V_H$  segment 5-2 (also known as  $\delta 1x$ ), which is known to be utilized less in the splenic B cell repertoire as compared to the early lineage BM B cell repertoire<sup>32</sup>. **b**, **c**, Dot plot and heat map comparing *Igk* V segment ( $V_K$ ) usage from RAG2-GFP<sup>+</sup> BM (**b**) and LP (**c**). To further validate our repertoire sequencing approach, the 8 independent experiments where the *Igk* repertoire was sequenced were divided randomly into two groups of 4 experiments each and compared against each other to reveal false detection rates due to multiple comparisons within the same tissue from independent pools of mice. The indicated  $P$  values were calculated from the  $\chi^2$  test and indicate no significant difference between these samples. The indicated  $P$  value was calculated from the  $\chi^2$  as above.

Germ free

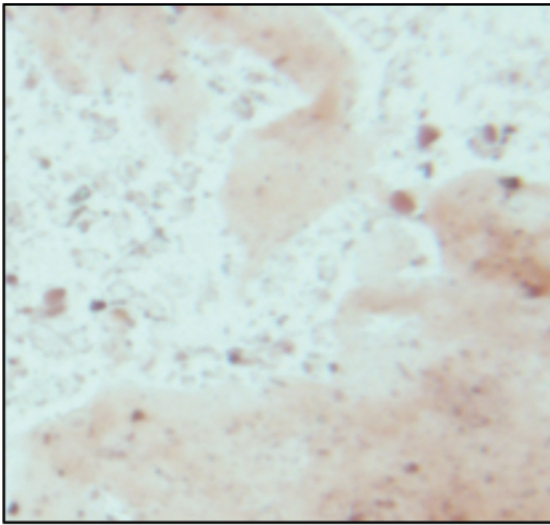

Co-housed

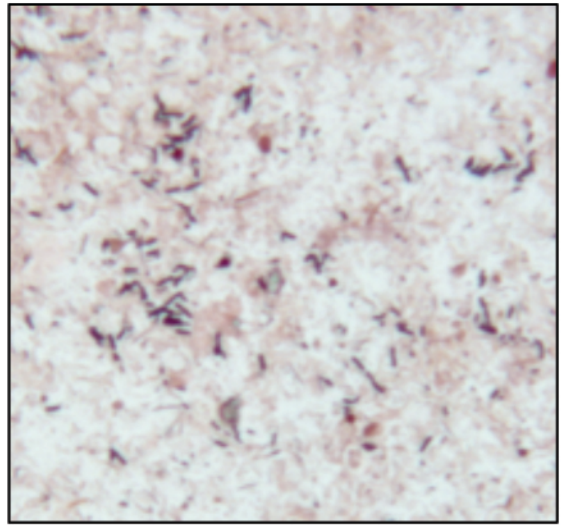

**Supplementary Figure 14 | Gram stain of small intestinal contents from germ-free and co-housed mice.** Photographs of gram-stained small intestinal (distal) contents from 4 wk-old germ-free, littermates that were colonized by cohousing with specific pathogen free mice for 7 days.

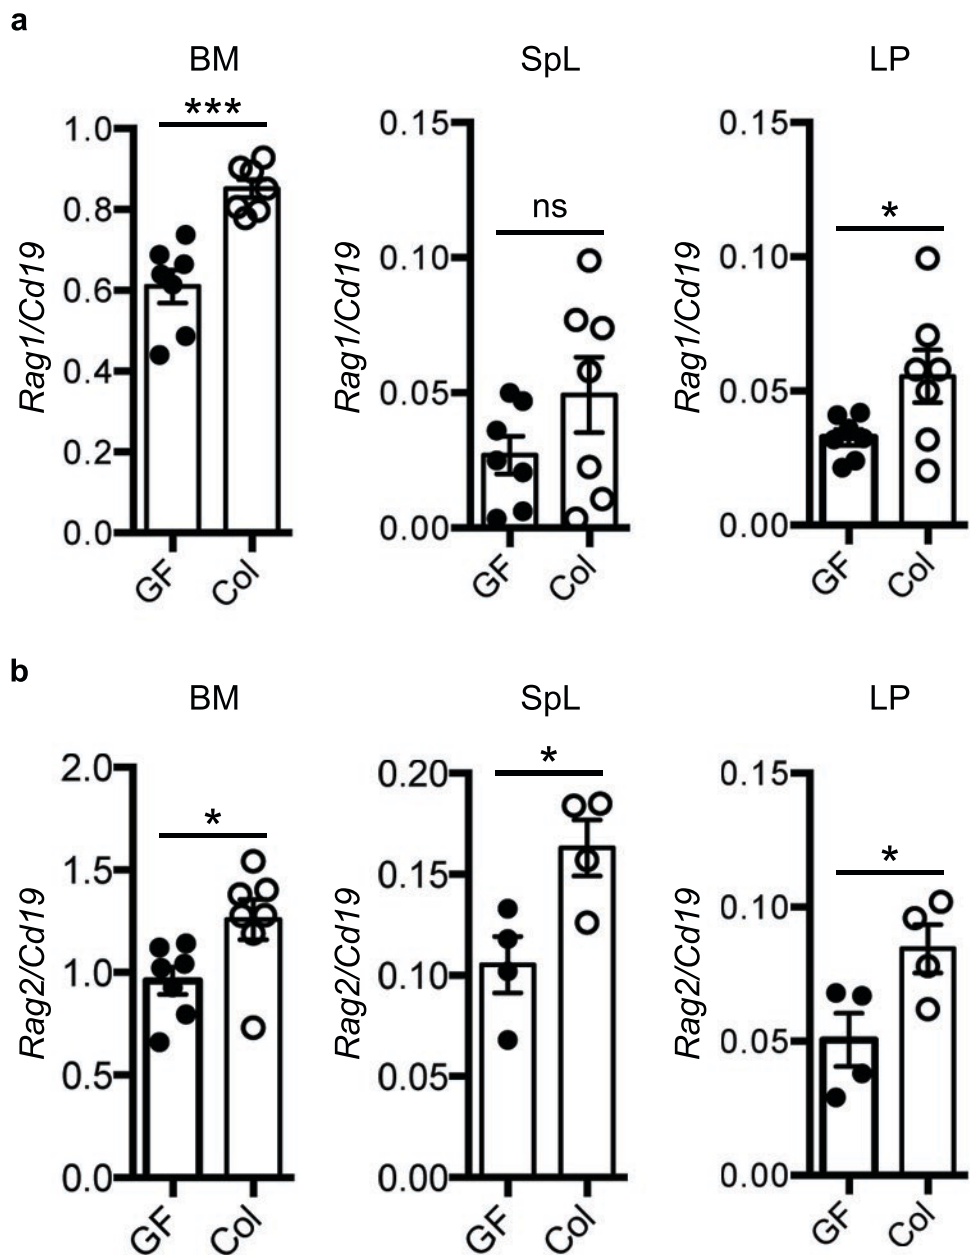

**Supplementary Figure 15 | Gut colonization leads to increased gut lamina propria *Rag* expression levels.** **a,b**, Bar graphs showing quantitative PCR for *Rag1* (**a**) and *Rag2* (**b**) expression in bone marrow (BM), spleen (SpL) and small intestinal lamina propria lymphocytes (LP) of 4 wk-old germ free (GF) mice and littermates that were colonized (Col) by co-housing with regular serum pathogen free (SPF) mice for 7 days prior to analysis. *Rag1* and *Rag2* levels were normalized to *Cd19* expression. *y*-axis values signify levels relative to wild type Balb/c BM. Shown are mean values  $\pm$  s.e.m. of at least 3 independent experiments. \* $P < 0.05$ , \*\*\* $P < 0.001$  (two-tailed Student's *t*-test).

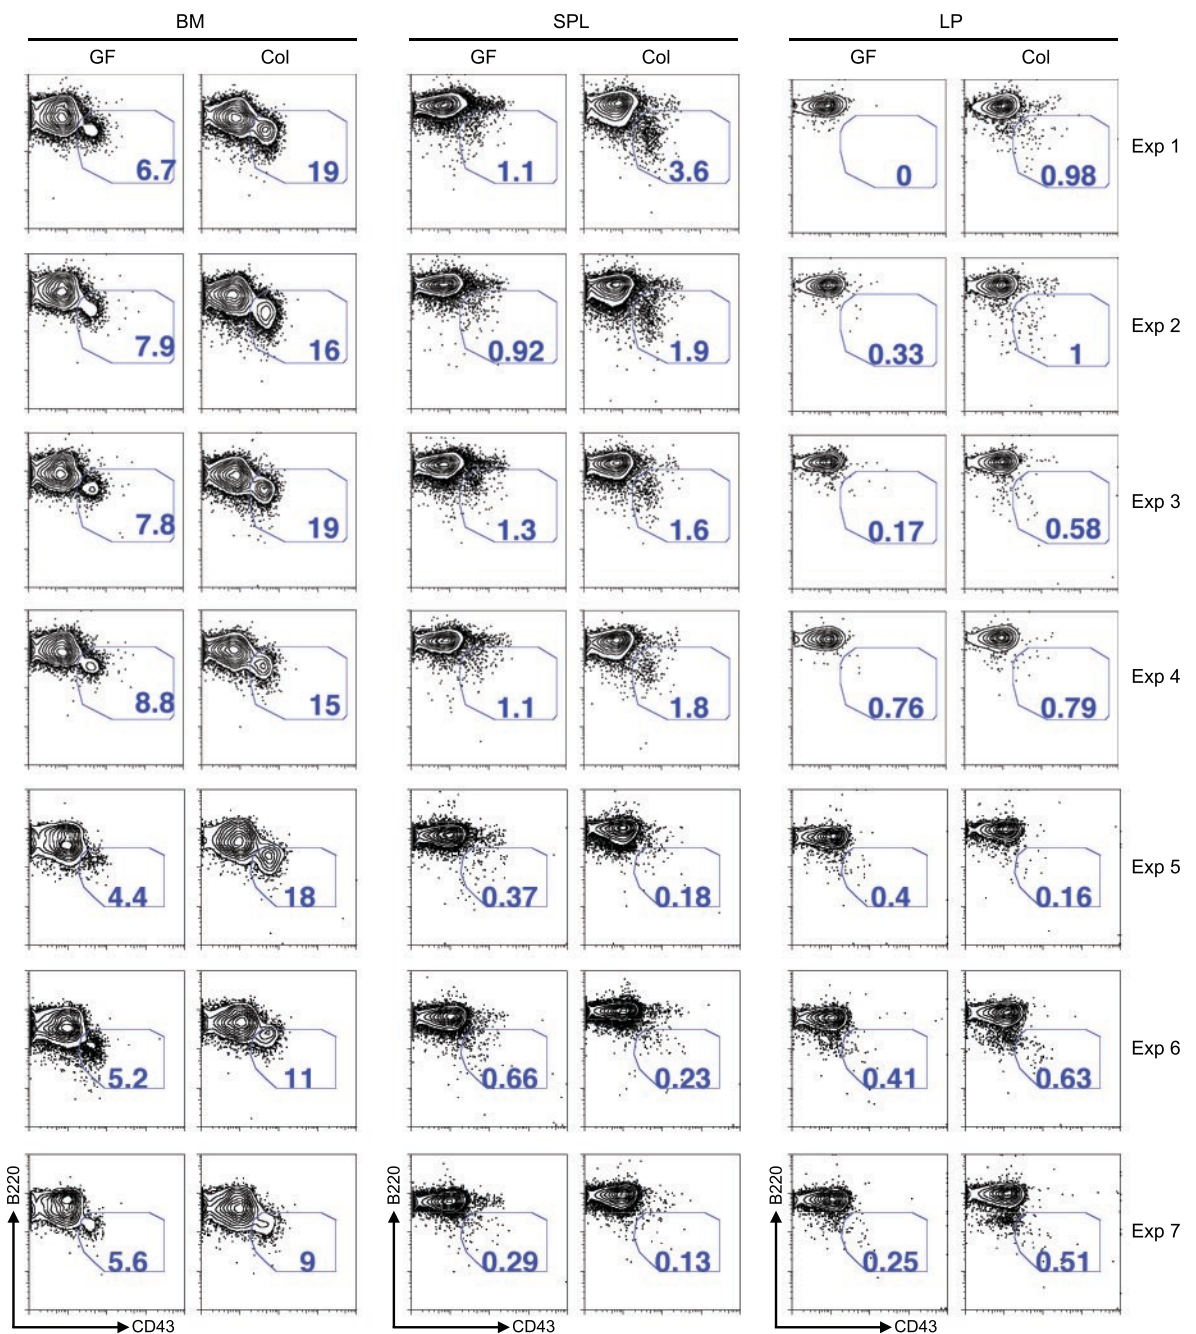

**Supplementary Figure 16 | Colonization of germ-free mice leads to increased proportion of pro-B cells.** FACS plots of CD19<sup>+</sup> gated cells from bone marrow (BM), spleen (SpL) and small intestinal lamina propria (LP). Total BM, SpL and LP lymphocytes were isolated from 4 wk-old germ-free (GF) mice or littermates that were colonized (Col) with microflora by co-housing with regular SPF mice for 7 days prior to analysis. The polygonal gates shown encompass cells with the pro-B phenotype (B220<sup>low</sup> CD43<sup>+</sup>). Numbers shown in the gates indicate percentages. Seven experiments are shown. Statistical analysis of these data is shown in Figure 4a.



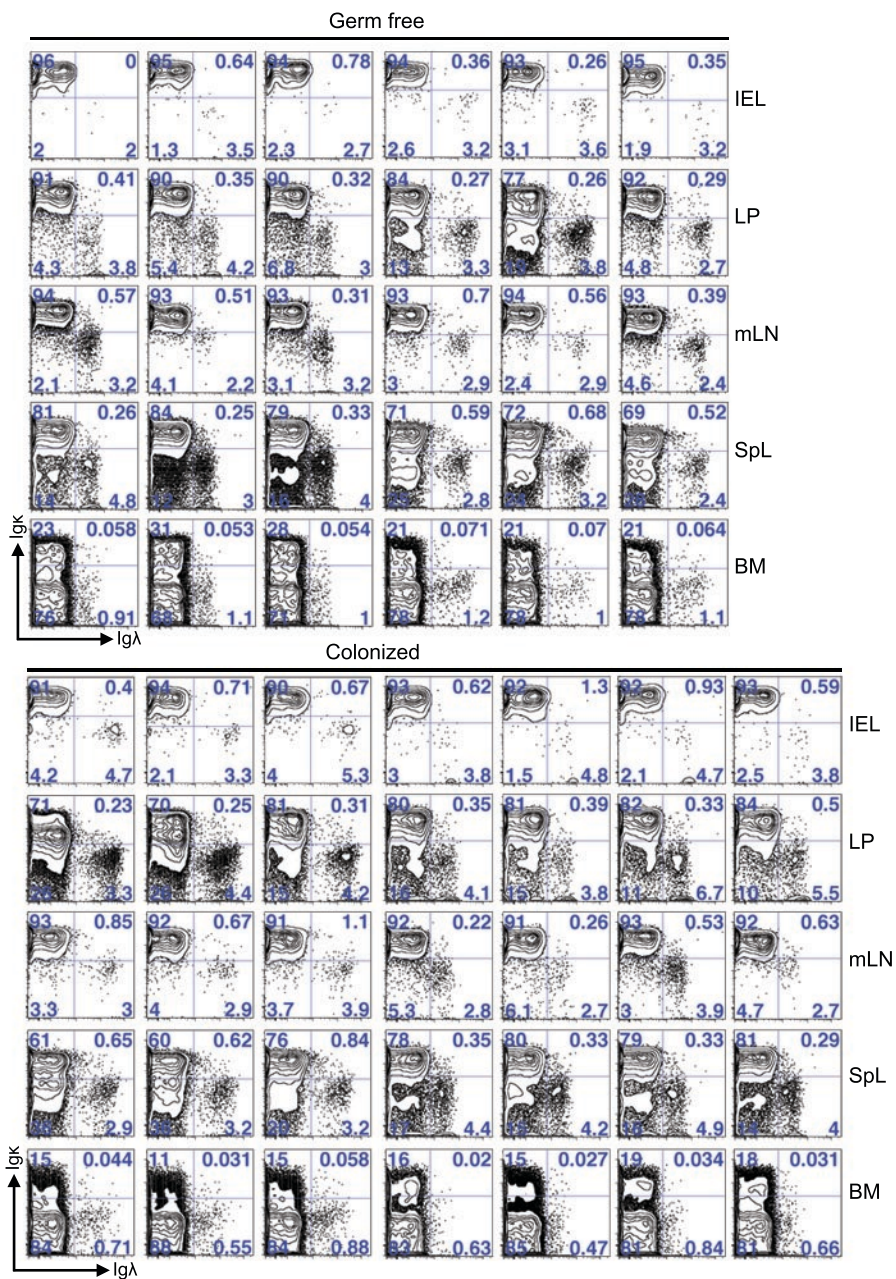

**Supplementary Figure 17 | Colonization of germ-free mice leads to increased  $Ig\lambda/Igk$  ratio specifically in lamina propria B cells.** FACS plots of  $CD19^+$  gated cells from intraepithelial lymphocytes (IEL), mesenteric lymph nodes (mLN), bone marrow (BM), spleen (SpL) and small intestinal lamina propria (LP) showing  $Igk$  and  $Ig\lambda$  expression. Total BM, SpL and mLN as well IEL and LP lymphocytes were isolated from 4 wk-old germ-free (GF) mice or littermates that were colonized (Col) with microflora by co-housing with regular SPF mice for 7 days prior to analysis. The plots are gated in quadrants. The upper left quadrant encompasses  $CD19^+ Igk^+$  B cells and the lower right quadrant encompasses  $CD19^+ Ig\lambda^+$  cells. The numbers shown in the gates indicate percentages of  $CD19^+$  cells. Plots from 6 germ-free mice are shown above and plots from 7 colonized mice are shown. Statistical analysis of these data is shown in Figure 4b.

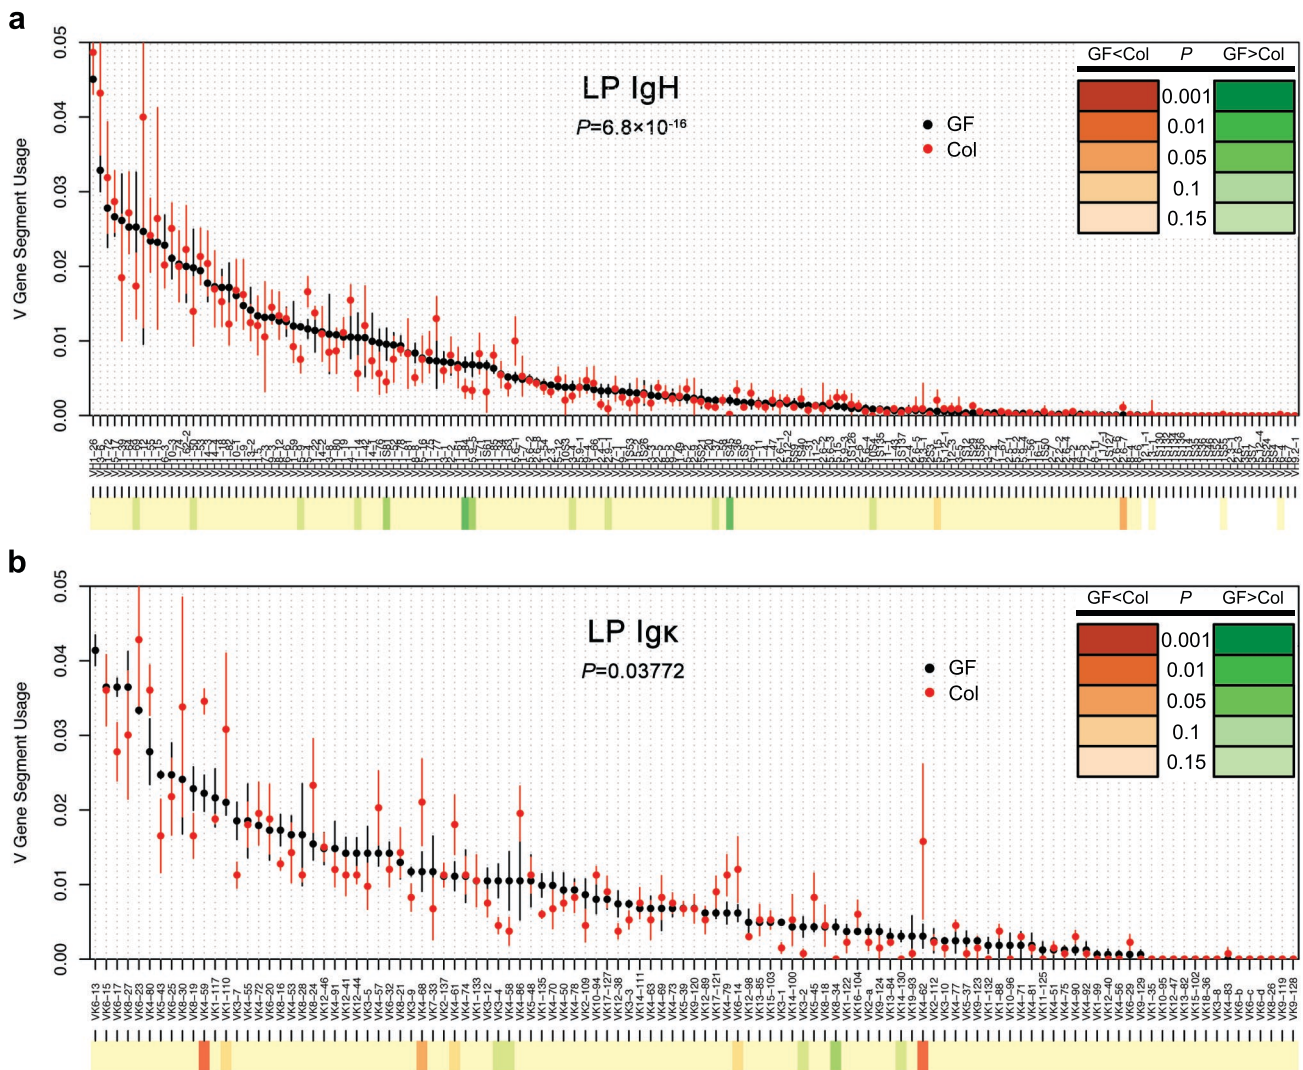

**Supplementary Figure 18 | Distinct  $V_H$  and  $V_K$  and segment usage in germ-free versus colonized mice.** **a,b**, Dot plot and heat map comparing *IgH*  $V$  segment ( $V_H$ ) usage (**a**) and *Igk*  $V$  segment ( $V_K$ ) usage (**b**) from germ-free Swiss Webster mice (GF, black) and littermates cohoused with SPF mice for 7 days (Col, red) as determined by 454 pyrosequencing. Aligned sequences with unique (determined by  $V(D)J$  junction analysis), in-frame  $V(D)J$  junctions were analyzed. Individual  $V$  gene segment usage ( $y$ -axis) was calculated by dividing the number of individual  $V_H$  or  $V_K$  gene segments by the total number of in-frame  $V_H$  or  $V_K$  gene segments represented in our sequencing data set, respectively. Individual  $V_H$  and  $V_K$  gene segments are arranged on the  $x$ -axis in order of highest to lowest utilization found in the bone marrow samples. Individual  $V$  gene segment names are shown. Plotted are the means  $\pm$  s.e.m. of at least 3 experiments. The  $P$  value for overall difference between GF and Col  $V$  segment utilization was calculated with  $\chi^2$  test. Heat map under dot plots shows sequence utilization differences between GF vs. Col with intensity of color specifying increased significance of the indicated  $P$  values (shown in insets) as calculated by the exact test for differential expression.

## Supplementary References

31. Mora, J.R. & Von Andrian, U.H. Specificity and plasticity of memory lymphocyte migration. *Curr Top Microbiol Immunol* **308**, 83-116 (2006).
32. Yancopoulos, G.D., et al. Preferential utilization of the most JH-proximal VH gene segments in pre-B-cell lines. *Nature* **311**, 727-733 (1984).
